# Supplementary material
Source: publisher figshare collection journal article supplement (https://acs.figshare.com/ndownloader/files/5691708)
Supplement: Supplementary file 1 [file 5691708]

# ic0106726.cif

data_k01kcm20


_audit_creation_method            SHELXL-97

_chemical_name_systematic

;

   ?

;

_chemical_name_common             ?

_chemical_melting_point           ?

_chemical_formula_moiety          ?

_chemical_formula_sum

   'C24 H27 O3 Sb'

_chemical_formula_weight          485.21


loop_

   _atom_type_symbol

   _atom_type_description

   _atom_type_scat_dispersion_real

   _atom_type_scat_dispersion_imag

   _atom_type_scat_source

   'C'  'C'   0.0033   0.0016

   'International Tables Vol C Tables 4.2.6.8 and 6.1.1.4'

   'H'  'H'   0.0000   0.0000

   'International Tables Vol C Tables 4.2.6.8 and 6.1.1.4'

   'O'  'O'   0.0106   0.0060

   'International Tables Vol C Tables 4.2.6.8 and 6.1.1.4'

   'Sb'  'Sb'  -0.5866   1.5461

   'International Tables Vol C Tables 4.2.6.8 and 6.1.1.4'


_symmetry_cell_setting            Monoclinic

_symmetry_space_group_name_H-M    P21/c


loop_

   _symmetry_equiv_pos_as_xyz

   'x, y, z'

   'x+1/2, -y, -z+1/2'

   '-x, -y, -z'

   '-x-1/2, y, z-1/2'


_cell_length_a                    10.9080(2)

_cell_length_b                    11.9660(2)

_cell_length_c                    17.7260(4)

_cell_angle_alpha                 109.7400(10)

_cell_angle_beta                  90

_cell_angle_gamma                 90

_cell_volume                      2177.72(7)

_cell_formula_units_Z             4

_cell_measurement_temperature     150(2)

_cell_measurement_reflns_used     25

_cell_measurement_theta_min       12

_cell_measurement_theta_max       18


_exptl_crystal_description        Irregular

_exptl_crystal_colour             Colourless

_exptl_crystal_size_max           0.25

_exptl_crystal_size_mid           0.15

_exptl_crystal_size_min           0.10

_exptl_crystal_density_meas       ?

_exptl_crystal_density_diffrn     1.480

_exptl_crystal_density_method     'not measured'

_exptl_crystal_F_000              984

_exptl_absorpt_coefficient_mu     1.288

_exptl_absorpt_correction_type 'multiscan'

_exptl_absorpt_process_details 'Sortav Blessing (1995) '

_exptl_absorpt_correction_T_max 1.049

_exptl_absorpt_correction_T_min  0.960

_exptl_absorpt_process_details ;

multi-scan from symmetry-related measurements (Blessing 1995);


_exptl_special_details

;

   ?

;


_diffrn_ambient_temperature       150(2)

_diffrn_radiation_wavelength      0.71070

_diffrn_radiation_type            MoK\a

_diffrn_radiation_source          'fine-focus sealed tube'

_diffrn_radiation_monochromator   graphite

_diffrn_measurement_device_type   KappaCCD

_diffrn_measurement_method        KappaCCD

_diffrn_detector_area_resol_mean  ?

_diffrn_standards_number          ?

_diffrn_standards_interval_count  ?

_diffrn_standards_interval_time   ?

_diffrn_standards_decay_%         ?

_diffrn_reflns_number             24802

_diffrn_reflns_av_R_equivalents   0.0709

_diffrn_reflns_av_sigmaI/netI     0.0509

_diffrn_reflns_limit_h_min        -14

_diffrn_reflns_limit_h_max        14

_diffrn_reflns_limit_k_min        -15

_diffrn_reflns_limit_k_max        15

_diffrn_reflns_limit_l_min        -22

_diffrn_reflns_limit_l_max        23

_diffrn_reflns_theta_min          3.62

_diffrn_reflns_theta_max          28.30

_reflns_number_total              5379

_reflns_number_gt                 4305

_reflns_threshold_expression      >2sigma(I)


_computing_data_collection        ?

_computing_cell_refinement        ?

_computing_data_reduction         'Denzo and Scalepack (otwinowski &
Minor, 1997

_computing_structure_solution     'SHELXS-97 (Sheldrick, 1990)'

_computing_structure_refinement   'SHELXL-97 (Sheldrick, 1997)'

_computing_molecular_graphics     'ORTEX (P.McArdle, 1995)'

_computing_publication_material   'SHELXL-97/2 (Sheldrick,1997)'


_refine_special_details

;

   Refinement of F^2^ against ALL reflections.  The weighted R-factor wR and

   goodness of fit S are based on F^2^, conventional R-factors R are based

   on F, with F set to zero for negative F^2^. The threshold expression of

   F^2^ > 2sigma(F^2^) is used only for calculating R-factors(gt) etc. and is

   not relevant to the choice of reflections for refinement.  R-factors based

   on F^2^ are statistically about twice as large as those based on F, and R-

   factors based on ALL data will be even larger.

;


_refine_ls_structure_factor_coef  Fsqd

_refine_ls_matrix_type            full

_refine_ls_weighting_scheme       calc

_refine_ls_weighting_details

   'calc w=1/[\s^2^(Fo^2^)+(0.0775P)^2^+0.9572P] where P=(Fo^2^+2Fc^2^)/3'

_atom_sites_solution_primary      direct

_atom_sites_solution_secondary    difmap

_atom_sites_solution_hydrogens    geom

_refine_ls_hydrogen_treatment     mixed

_refine_ls_extinction_method      SHELXL

_refine_ls_extinction_coef        0.0042(6)

_refine_ls_extinction_expression

   'Fc^*^=kFc[1+0.001xFc^2^\l^3^/sin(2\q)]^-1/4^'

_refine_ls_number_reflns          5379

_refine_ls_number_parameters      260

_refine_ls_number_restraints      0

_refine_ls_R_factor_all           0.0514

_refine_ls_R_factor_gt            0.0335

_refine_ls_wR_factor_ref          0.0986

_refine_ls_wR_factor_gt           0.0872

_refine_ls_goodness_of_fit_ref    0.830

_refine_ls_restrained_S_all       0.830

_refine_ls_shift/su_max           0.002

_refine_ls_shift/su_mean          0.000


loop_

   _atom_site_label

   _atom_site_type_symbol

   _atom_site_fract_x

   _atom_site_fract_y

   _atom_site_fract_z

   _atom_site_U_iso_or_equiv

   _atom_site_adp_type

   _atom_site_occupancy

   _atom_site_symetry_multiplicity

   _atom_site_calc_flag

   _atom_site_refinement_flags

   _atom_site_disorder_assembly

   _atom_site_disorder_group

Sb1 Sb 0.120814(17) 0.875006(16) 0.224411(10) 0.02092(9) Uani 1 1 d . . .

O1 O 0.14109(19) 0.72670(19) 0.13240(12) 0.0255(4) Uani 1 1 d . . .

O3 O 0.16796(19) 0.80100(18) 0.30383(12) 0.0233(4) Uani 1 1 d . . .

O2 O 0.29083(18) 0.92869(19) 0.22235(12) 0.0258(4) Uani 1 1 d . . .

C1 C 0.0624(3) 0.7015(2) 0.06776(17) 0.0243(6) Uani 1 1 d . . .

C2 C -0.0507(3) 0.6479(3) 0.0712(2) 0.0318(7) Uani 1 1 d . . .

C3 C -0.1255(3) 0.6190(3) 0.0032(3) 0.0455(10) Uani 1 1 d . . .

H3 H -0.2018 0.5808 0.0033 0.055 Uiso 1 1 calc R . .

C4 C -0.0915(4) 0.6446(4) -0.0633(2) 0.0521(12) Uani 1 1 d . . .

H4 H -0.1444 0.6248 -0.1085 0.062 Uiso 1 1 calc R . .

C5 C 0.0184(4) 0.6985(4) -0.0651(2) 0.0478(10) Uani 1 1 d . . .

H5 H 0.0408 0.7159 -0.1117 0.057 Uiso 1 1 calc R . .

C6 C 0.0985(3) 0.7285(3) 0.00024(19) 0.0331(7) Uani 1 1 d . . .

C7 C -0.0902(3) 0.6233(3) 0.1449(3) 0.0430(9) Uani 1 1 d . . .

H7A H -0.1619 0.5710 0.1325 0.064 Uiso 1 1 calc R . .

H7B H -0.1113 0.6982 0.1870 0.064 Uiso 1 1 calc R . .

H7C H -0.0231 0.5847 0.1635 0.064 Uiso 1 1 calc R . .

C8 C 0.2198(4) 0.7871(4) -0.0015(2) 0.0442(9) Uani 1 1 d . . .

H8A H 0.2860 0.7297 -0.0064 0.066 Uiso 1 1 calc R . .

H8B H 0.2303 0.8547 0.0481 0.066 Uiso 1 1 calc R . .

H8C H 0.2222 0.8150 -0.0475 0.066 Uiso 1 1 calc R . .

C9 C 0.3896(3) 0.9159(3) 0.26710(18) 0.0239(6) Uani 1 1 d . . .

C10 C 0.3968(3) 0.9856(3) 0.34840(19) 0.0313(7) Uani 1 1 d . . .

C11 C 0.5038(4) 0.9777(4) 0.3891(2) 0.0443(10) Uani 1 1 d . . .

H11 H 0.5111 1.0241 0.4442 0.053 Uiso 1 1 calc R . .

C12 C 0.5998(4) 0.9043(4) 0.3516(3) 0.0475(11) Uani 1 1 d . . .

H12 H 0.6721 0.9007 0.3806 0.057 Uiso 1 1 calc R . .

C13 C 0.5893(3) 0.8366(3) 0.2720(3) 0.0414(9) Uani 1 1 d . . .

H13 H 0.6550 0.7857 0.2463 0.050 Uiso 1 1 calc R . .

C14 C 0.4846(3) 0.8409(3) 0.22789(19) 0.0286(6) Uani 1 1 d . . .

C15 C 0.2949(4) 1.0673(3) 0.3898(2) 0.0426(9) Uani 1 1 d . . .

H15A H 0.3242 1.1219 0.4413 0.064 Uiso 1 1 calc R . .

H15B H 0.2262 1.0206 0.3989 0.064 Uiso 1 1 calc R . .

H15C H 0.2675 1.1129 0.3562 0.064 Uiso 1 1 calc R . .

C16 C 0.4743(3) 0.7707(3) 0.1399(2) 0.0376(8) Uani 1 1 d . . .

H16A H 0.4046 0.7161 0.1310 0.056 Uiso 1 1 calc R . .

H16B H 0.5498 0.7252 0.1216 0.056 Uiso 1 1 calc R . .

H16C H 0.4618 0.8251 0.1099 0.056 Uiso 1 1 calc R . .

C17 C 0.0956(3) 0.7255(3) 0.32922(18) 0.0246(6) Uani 1 1 d . . .

C18 C 0.1334(3) 0.6074(3) 0.3079(2) 0.0329(7) Uani 1 1 d . . .

C19 C 0.0665(4) 0.5345(3) 0.3396(3) 0.0489(10) Uani 1 1 d . . .

H19 H 0.0899 0.4537 0.3263 0.059 Uiso 1 1 calc R . .

C20 C -0.0326(5) 0.5758(4) 0.3895(3) 0.0618(13) Uani 1 1 d . . .

H20 H -0.0760 0.5242 0.4107 0.074 Uiso 1 1 calc R . .

C21 C -0.0679(4) 0.6921(4) 0.4083(2) 0.0469(10) Uani 1 1 d . . .

H21 H -0.1365 0.7201 0.4425 0.056 Uiso 1 1 calc R . .

C22 C -0.0060(3) 0.7701(3) 0.37856(18) 0.0322(7) Uani 1 1 d . . .

C23 C 0.2424(4) 0.5649(3) 0.2543(2) 0.0419(8) Uani 1 1 d . . .

H23A H 0.2544 0.4799 0.2439 0.063 Uiso 1 1 calc R . .

H23B H 0.3155 0.6085 0.2805 0.063 Uiso 1 1 calc R . .

H23C H 0.2284 0.5786 0.2035 0.063 Uiso 1 1 calc R . .

C24 C -0.0457(3) 0.8977(3) 0.3991(2) 0.0425(8) Uani 1 1 d . . .

H24A H -0.1055 0.9172 0.4429 0.064 Uiso 1 1 calc R . .

H24B H -0.0833 0.9089 0.3520 0.064 Uiso 1 1 calc R . .

H24C H 0.0258 0.9498 0.4158 0.064 Uiso 1 1 calc R . .


loop_

   _atom_site_aniso_label

   _atom_site_aniso_U_11

   _atom_site_aniso_U_22

   _atom_site_aniso_U_33

   _atom_site_aniso_U_23

   _atom_site_aniso_U_13

   _atom_site_aniso_U_12

Sb1 0.01847(13) 0.02366(13) 0.02122(12) 0.00837(8) 0.00003(7) 0.00201(7)

O1 0.0235(11) 0.0279(11) 0.0229(10) 0.0057(8) -0.0046(8) 0.0028(8)

O3 0.0214(10) 0.0288(10) 0.0233(10) 0.0135(8) -0.0017(8) -0.0029(8)

O2 0.0219(11) 0.0327(11) 0.0267(11) 0.0154(9) -0.0026(8) -0.0048(8)

C1 0.0254(15) 0.0223(14) 0.0201(14) 0.0006(11) -0.0056(11) 0.0041(11)

C2 0.0285(17) 0.0235(15) 0.0382(18) 0.0037(13) -0.0085(13) 0.0018(12)

C3 0.0287(19) 0.0338(19) 0.059(2) -0.0045(17) -0.0183(16) 0.0035(14)

C4 0.055(3) 0.049(2) 0.034(2) -0.0092(17) -0.0252(18) 0.0209(19)

C5 0.057(3) 0.054(2) 0.0259(17) 0.0056(16) -0.0064(16) 0.025(2)

C6 0.0381(19) 0.0324(17) 0.0237(15) 0.0027(13) 0.0010(13) 0.0123(13)

C7 0.0288(18) 0.040(2) 0.065(3) 0.0238(19) -0.0032(17) -0.0055(15)

C8 0.045(2) 0.056(2) 0.0335(19) 0.0171(17) 0.0132(16) 0.0120(18)

C9 0.0194(15) 0.0270(15) 0.0288(15) 0.0141(12) -0.0039(11) -0.0094(10)

C10 0.0335(18) 0.0365(17) 0.0275(16) 0.0156(13) -0.0047(12) -0.0191(13)

C11 0.054(2) 0.058(2) 0.0285(17) 0.0242(16) -0.0153(16) -0.0333(19)

C12 0.039(2) 0.066(3) 0.056(2) 0.045(2) -0.0221(18) -0.0220(19)

C13 0.0316(18) 0.041(2) 0.065(3) 0.0345(19) -0.0054(17) -0.0028(15)

C14 0.0295(17) 0.0233(14) 0.0377(17) 0.0165(13) -0.0031(13) -0.0047(12)

C15 0.047(2) 0.0389(19) 0.0327(18) 0.0003(15) 0.0073(15) -0.0170(16)

C16 0.0359(19) 0.0276(17) 0.045(2) 0.0061(14) 0.0061(15) 0.0006(13)

C17 0.0232(15) 0.0301(15) 0.0241(14) 0.0139(12) -0.0079(11) -0.0087(11)

C18 0.0337(18) 0.0329(17) 0.0346(17) 0.0147(14) -0.0115(14) -0.0064(13)

C19 0.055(3) 0.038(2) 0.063(3) 0.0296(19) -0.016(2) -0.0155(18)

C20 0.058(3) 0.072(3) 0.073(3) 0.048(3) -0.011(2) -0.034(2)

C21 0.029(2) 0.073(3) 0.044(2) 0.028(2) -0.0002(15) -0.0174(18)

C22 0.0257(16) 0.0466(19) 0.0248(15) 0.0129(14) -0.0064(12) -0.0111(13)

C23 0.047(2) 0.0334(18) 0.0404(19) 0.0060(15) -0.0094(16) 0.0095(15)

C24 0.0305(18) 0.055(2) 0.0350(18) 0.0065(16) 0.0076(14) 0.0007(16)


_geom_special_details

;

   All esds (except the esd in the dihedral angle between two l.s. planes)

   are estimated using the full covariance matrix.  The cell esds are taken

   into account individually in the estimation of esds in distances, angles

   and torsion angles; correlations between esds in cell parameters are only

   used when they are defined by crystal symmetry.  An approximate (isotropic)

   treatment of cell esds is used for estimating esds involving l.s. planes.

;


loop_

   _geom_bond_atom_site_label_1

   _geom_bond_atom_site_label_2

   _geom_bond_distance

   _geom_bond_site_symmetry_2

   _geom_bond_publ_flag

Sb1 O2 1.967(2) . ?

Sb1 O3 1.968(2) . ?

Sb1 O1 1.976(2) . ?

O1 C1 1.381(3) . ?

O3 C17 1.384(3) . ?

O2 C9 1.376(3) . ?

C1 C6 1.398(5) . ?

C1 C2 1.401(5) . ?

C2 C3 1.399(5) . ?

C2 C7 1.497(5) . ?

C3 C4 1.366(7) . ?

C4 C5 1.367(7) . ?

C5 C6 1.397(5) . ?

C6 C8 1.503(5) . ?

C9 C14 1.393(4) . ?

C9 C10 1.402(4) . ?

C10 C11 1.391(5) . ?

C10 C15 1.499(5) . ?

C11 C12 1.384(6) . ?

C12 C13 1.375(6) . ?

C13 C14 1.395(5) . ?

C14 C16 1.505(5) . ?

C17 C18 1.396(5) . ?

C17 C22 1.400(5) . ?

C18 C19 1.392(5) . ?

C18 C23 1.500(5) . ?

C19 C20 1.378(7) . ?

C20 C21 1.372(7) . ?

C21 C22 1.392(5) . ?

C22 C24 1.509(5) . ?


loop_

   _geom_angle_atom_site_label_1

   _geom_angle_atom_site_label_2

   _geom_angle_atom_site_label_3

   _geom_angle

   _geom_angle_site_symmetry_1

   _geom_angle_site_symmetry_3

   _geom_angle_publ_flag

O2 Sb1 O3 89.75(8) . . ?

O2 Sb1 O1 95.00(9) . . ?

O3 Sb1 O1 93.76(8) . . ?

C1 O1 Sb1 119.94(17) . . ?

C17 O3 Sb1 125.74(17) . . ?

C9 O2 Sb1 128.80(17) . . ?

O1 C1 C6 119.1(3) . . ?

O1 C1 C2 119.1(3) . . ?

C6 C1 C2 121.8(3) . . ?

C3 C2 C1 117.4(3) . . ?

C3 C2 C7 121.3(3) . . ?

C1 C2 C7 121.3(3) . . ?

C4 C3 C2 121.5(4) . . ?

C3 C4 C5 120.3(3) . . ?

C4 C5 C6 121.3(4) . . ?

C5 C6 C1 117.7(4) . . ?

C5 C6 C8 121.6(3) . . ?

C1 C6 C8 120.7(3) . . ?

O2 C9 C14 118.2(3) . . ?

O2 C9 C10 119.6(3) . . ?

C14 C9 C10 122.0(3) . . ?

C11 C10 C9 117.3(3) . . ?

C11 C10 C15 121.0(3) . . ?

C9 C10 C15 121.6(3) . . ?

C12 C11 C10 121.9(3) . . ?

C13 C12 C11 119.2(3) . . ?

C12 C13 C14 121.5(4) . . ?

C9 C14 C13 118.0(3) . . ?

C9 C14 C16 120.1(3) . . ?

C13 C14 C16 121.9(3) . . ?

O3 C17 C18 117.1(3) . . ?

O3 C17 C22 120.1(3) . . ?

C18 C17 C22 122.6(3) . . ?

C19 C18 C17 116.8(3) . . ?

C19 C18 C23 123.1(3) . . ?

C17 C18 C23 120.0(3) . . ?

C20 C19 C18 122.2(4) . . ?

C21 C20 C19 119.3(4) . . ?

C20 C21 C22 121.8(4) . . ?

C21 C22 C17 117.3(3) . . ?

C21 C22 C24 121.5(3) . . ?

C17 C22 C24 121.2(3) . . ?


_diffrn_measured_fraction_theta_max    0.993

_diffrn_reflns_theta_full              28.30

_diffrn_measured_fraction_theta_full   0.993

_refine_diff_density_max    0.492

_refine_diff_density_min   -0.366

_refine_diff_density_rms    0.090

#===END

data_k00kcm8


_audit_creation_method            SHELXL-97

_chemical_name_systematic

;

   ?

;

_chemical_name_common             ?

_chemical_melting_point               -999.0

_chemical_formula_moiety          ?

_chemical_formula_sum

   'C10 H28 N O5 Sb'

_chemical_formula_weight          364.08


loop_

   _atom_type_symbol

   _atom_type_description

   _atom_type_scat_dispersion_real

   _atom_type_scat_dispersion_imag

   _atom_type_scat_source

   'C'  'C'   0.0033   0.0016

   'International Tables Vol C Tables 4.2.6.8 and 6.1.1.4'

   'H'  'H'   0.0000   0.0000

   'International Tables Vol C Tables 4.2.6.8 and 6.1.1.4'

   'O'  'O'   0.0106   0.0060

   'International Tables Vol C Tables 4.2.6.8 and 6.1.1.4'

   'N'  'N'   0.0061   0.0033

   'International Tables Vol C Tables 4.2.6.8 and 6.1.1.4'

   'Sb'  'Sb'  -0.5866   1.5461

   'International Tables Vol C Tables 4.2.6.8 and 6.1.1.4'


_symmetry_cell_setting            Monoclinic

_symmetry_space_group_name_H-M    P21/c


loop_

   _symmetry_equiv_pos_as_xyz

   'x, y, z'

   '-x, y+1/2, -z+1/2'

   '-x, -y, -z'

   'x, -y-1/2, z-1/2'


_cell_length_a                    7.72200(10)

_cell_length_b                    19.0700(2)

_cell_length_c                    21.6800(3)

_cell_angle_alpha                 90.00

_cell_angle_beta                  93.4960(7)

_cell_angle_gamma                 90.00

_cell_volume                      3186.62(7)

_cell_formula_units_Z             8

_cell_measurement_temperature     170(2)

_cell_measurement_reflns_used     ?

_cell_measurement_theta_min       ?

_cell_measurement_theta_max       ?


_exptl_crystal_description        Needle

_exptl_crystal_colour             Colourless

_exptl_crystal_size_max           0.30

_exptl_crystal_size_mid           0.08

_exptl_crystal_size_min           0.08

_exptl_crystal_density_meas       ?

_exptl_crystal_density_diffrn     1.518

_exptl_crystal_density_method     'not measured'

_exptl_crystal_F_000              1488

_exptl_absorpt_coefficient_mu     1.741

_exptl_absorpt_correction_type    multiscan

_exptl_absorpt_correction_T_min   0.6232

_exptl_absorpt_correction_T_max   0.8805

_exptl_absorpt_process_details    'Sortav Blessing (1995)'


_exptl_special_details

;

   ?

;


_diffrn_ambient_temperature       170(2)

_diffrn_radiation_wavelength      0.71070

_diffrn_radiation_type            MoK\a

_diffrn_radiation_source          'fine-focus sealed tube'

_diffrn_radiation_monochromator   graphite

_diffrn_measurement_device_type   KappaCCD

_diffrn_measurement_method        KappaCCD

_diffrn_detector_area_resol_mean  ?

_diffrn_standards_number          ?

_diffrn_standards_interval_count  ?

_diffrn_standards_interval_time   ?

_diffrn_standards_decay_%         ?

_diffrn_reflns_number             92952

_diffrn_reflns_av_R_equivalents   0.0625

_diffrn_reflns_av_sigmaI/netI     0.0246

_diffrn_reflns_limit_h_min        -10

_diffrn_reflns_limit_h_max        10

_diffrn_reflns_limit_k_min        -24

_diffrn_reflns_limit_k_max        24

_diffrn_reflns_limit_l_min        -28

_diffrn_reflns_limit_l_max        28

_diffrn_reflns_theta_min          3.57

_diffrn_reflns_theta_max          27.46

_reflns_number_total              7238

_reflns_number_gt                 6291

_reflns_threshold_expression      >2sigma(I)


_computing_data_collection        ?

_computing_cell_refinement        ?

_computing_data_reduction         'Denzo and Scalepak (Otwinowski &
Minor, 1997)

_computing_structure_solution     'SHELXS-97 (Sheldrick, 1990)'

_computing_structure_refinement   'SHELXL-97 (Sheldrick, 1997)'

_computing_molecular_graphics     'ORTEX (P.McArdle, 1995)'

_computing_publication_material   'SHELXL-97/2 (Sheldrick,1997)'


_refine_special_details

;

   Refinement of F^2^ against ALL reflections.  The weighted R-factor wR and

   goodness of fit S are based on F^2^, conventional R-factors R are based

   on F, with F set to zero for negative F^2^. The threshold expression of

   F^2^ > 2sigma(F^2^) is used only for calculating R-factors(gt) etc. and is

   not relevant to the choice of reflections for refinement.  R-factors based

   on F^2^ are statistically about twice as large as those based on F, and R-

   factors based on ALL data will be even larger.

;


_refine_ls_structure_factor_coef  Fsqd

_refine_ls_matrix_type            full

_refine_ls_weighting_scheme       calc

_refine_ls_weighting_details

   'calc w=1/[\s^2^(Fo^2^)+(0.1011P)^2^+10.1291P] where P=(Fo^2^+2Fc^2^)/3'

_atom_sites_solution_primary      direct

_atom_sites_solution_secondary    difmap

_atom_sites_solution_hydrogens    geom

_refine_ls_hydrogen_treatment     mixed

_refine_ls_extinction_method      SHELXL

_refine_ls_extinction_coef        0.0000(3)

_refine_ls_extinction_expression

   'Fc^*^=kFc[1+0.001xFc^2^\l^3^/sin(2\q)]^-1/4^'

_refine_ls_number_reflns          7238

_refine_ls_number_parameters      314

_refine_ls_number_restraints      0

_refine_ls_R_factor_all           0.0495

_refine_ls_R_factor_gt            0.0402

_refine_ls_wR_factor_ref          0.1341

_refine_ls_wR_factor_gt           0.1245

_refine_ls_goodness_of_fit_ref    0.875

_refine_ls_restrained_S_all       0.875

_refine_ls_shift/su_max           0.813

_refine_ls_shift/su_mean          0.003


loop_

   _atom_site_label

   _atom_site_type_symbol

   _atom_site_fract_x

   _atom_site_fract_y

   _atom_site_fract_z

   _atom_site_U_iso_or_equiv

   _atom_site_adp_type

   _atom_site_occupancy

   _atom_site_symetry_multiplicity

   _atom_site_calc_flag

   _atom_site_refinement_flags

   _atom_site_disorder_assembly

   _atom_site_disorder_group

Sb1 Sb 0.67982(3) 0.269429(15) 0.549791(13) 0.02974(11) Uani 1 1 d . . .

Sb2 Sb 0.21085(3) 0.208897(17) 0.714956(14) 0.03382(12) Uani 1 1 d . . .

O1 O 0.6730(4) 0.3130(2) 0.46832(15) 0.0438(8) Uani 1 1 d . . .

O2 O 0.8561(4) 0.33359(16) 0.58804(14) 0.0341(6) Uani 1 1 d . . .

O3 O 0.4793(4) 0.32443(17) 0.57506(15) 0.0359(7) Uani 1 1 d . . .

O4 O 0.8820(4) 0.20907(18) 0.53795(15) 0.0373(7) Uani 1 1 d . . .

O5 O 0.5221(4) 0.19306(18) 0.52361(15) 0.0398(7) Uani 1 1 d . . .

O6 O 0.4248(4) 0.26493(17) 0.72374(15) 0.0350(7) Uani 1 1 d . . .

O7 O 0.0757(5) 0.2896(2) 0.74030(17) 0.0460(9) Uani 1 1 d . . .

O8 O 0.2363(5) 0.1681(2) 0.79723(17) 0.0515(10) Uani 1 1 d . . .

O9 O -0.0068(4) 0.15758(19) 0.69355(19) 0.0487(9) Uani 1 1 d . . .

O10 O 0.3590(4) 0.13957(17) 0.67619(16) 0.0385(7) Uani 1 1 d . . .

N1 N 0.6712(5) 0.2204(2) 0.63862(17) 0.0313(7) Uani 1 1 d . . .

H1A H 0.5973 0.2445 0.6620 0.07(2) Uiso 1 1 calc R . .

H1B H 0.7793 0.2204 0.6579 0.10(3) Uiso 1 1 calc R . .

H1C H 0.6333 0.1754 0.6337 0.09(2) Uiso 1 1 calc R . .

N2 N 0.1699(5) 0.2550(2) 0.62434(18) 0.0343(8) Uani 1 1 d . . .

H2A H 0.1367 0.2211 0.5965 0.043(15) Uiso 1 1 calc R . .

H2B H 0.2703 0.2751 0.6132 0.021(11) Uiso 1 1 calc R . .

H2C H 0.0856 0.2883 0.6251 0.035(13) Uiso 1 1 calc R . .

C1 C 0.8259(7) 0.3302(3) 0.4378(3) 0.0533(14) Uani 1 1 d . . .

H1D H 0.8156 0.3121 0.3949 0.064 Uiso 1 1 calc R . .

H1E H 0.9276 0.3076 0.4595 0.064 Uiso 1 1 calc R . .

C2 C 0.8524(9) 0.4077(4) 0.4368(4) 0.079(2) Uani 1 1 d . . .

H2D H 0.9577 0.4185 0.4155 0.118 Uiso 1 1 calc R . .

H2E H 0.8647 0.4255 0.4792 0.118 Uiso 1 1 calc R . .

H2F H 0.7523 0.4301 0.4148 0.118 Uiso 1 1 calc R . .

C3 C 0.8201(8) 0.3903(4) 0.6260(4) 0.077(2) Uani 1 1 d . . .

H3A H 0.7670 0.3730 0.6635 0.092 Uiso 1 1 calc R . .

H3B H 0.7355 0.4218 0.6037 0.092 Uiso 1 1 calc R . .

C4 C 0.9805(7) 0.4306(3) 0.6444(3) 0.0507(13) Uani 1 1 d . . .

H4A H 0.9512 0.4698 0.6711 0.076 Uiso 1 1 calc R . .

H4B H 1.0317 0.4488 0.6073 0.076 Uiso 1 1 calc R . .

H4C H 1.0639 0.3997 0.6668 0.076 Uiso 1 1 calc R . .

C5 C 0.4355(7) 0.3931(3) 0.5512(3) 0.0485(12) Uani 1 1 d . . .

H5A H 0.5365 0.4132 0.5314 0.058 Uiso 1 1 calc R . .

H5B H 0.4078 0.4244 0.5858 0.058 Uiso 1 1 calc R . .

C6 C 0.2824(7) 0.3898(3) 0.5048(3) 0.0547(14) Uani 1 1 d . . .

H6A H 0.2555 0.4371 0.4893 0.082 Uiso 1 1 calc R . .

H6B H 0.1818 0.3709 0.5247 0.082 Uiso 1 1 calc R . .

H6C H 0.3104 0.3594 0.4704 0.082 Uiso 1 1 calc R . .

C7 C 0.8826(7) 0.1625(3) 0.4864(3) 0.0521(13) Uani 1 1 d . . .

H7A H 0.9896 0.1700 0.4643 0.063 Uiso 1 1 calc R . .

H7B H 0.7821 0.1731 0.4574 0.063 Uiso 1 1 calc R . .

C8 C 0.8741(10) 0.0877(4) 0.5060(4) 0.080(2) Uani 1 1 d . . .

H8A H 0.8752 0.0573 0.4696 0.120 Uiso 1 1 calc R . .

H8B H 0.7671 0.0798 0.5271 0.120 Uiso 1 1 calc R . .

H8C H 0.9745 0.0769 0.5343 0.120 Uiso 1 1 calc R . .

C9 C 0.3962(7) 0.1987(3) 0.4730(3) 0.0499(13) Uani 1 1 d . . .

H9A H 0.4386 0.2310 0.4416 0.060 Uiso 1 1 calc R . .

H9B H 0.2869 0.2180 0.4876 0.060 Uiso 1 1 calc R . .

C10 C 0.3634(8) 0.1281(4) 0.4452(3) 0.0614(16) Uani 1 1 d . . .

H10A H 0.2776 0.1321 0.4102 0.092 Uiso 1 1 calc R . .

H10B H 0.3191 0.0966 0.4763 0.092 Uiso 1 1 calc R . .

H10C H 0.4719 0.1092 0.4309 0.092 Uiso 1 1 calc R . .

C11 C 0.4522(7) 0.3117(3) 0.7752(2) 0.0464(12) Uani 1 1 d . . .

H11A H 0.5685 0.3032 0.7957 0.056 Uiso 1 1 calc R . .

H11B H 0.3646 0.3024 0.8057 0.056 Uiso 1 1 calc R . .

C12 C 0.4389(8) 0.3874(3) 0.7543(3) 0.0604(15) Uani 1 1 d . . .

H12A H 0.4585 0.4184 0.7901 0.091 Uiso 1 1 calc R . .

H12B H 0.3230 0.3960 0.7348 0.091 Uiso 1 1 calc R . .

H12C H 0.5265 0.3967 0.7245 0.091 Uiso 1 1 calc R . .

C13 C -0.0247(8) 0.2887(3) 0.7932(3) 0.0538(14) Uani 1 1 d . . .

H13A H 0.0410 0.2650 0.8279 0.065 Uiso 1 1 calc R . .

H13B H -0.1336 0.2623 0.7839 0.065 Uiso 1 1 calc R . .

C14 C -0.0653(8) 0.3619(4) 0.8109(3) 0.0564(14) Uani 1 1 d . . .

H14A H -0.1356 0.3614 0.8471 0.085 Uiso 1 1 calc R . .

H14B H -0.1301 0.3851 0.7764 0.085 Uiso 1 1 calc R . .

H14C H 0.0429 0.3874 0.8209 0.085 Uiso 1 1 calc R . .

C15 C 0.4001(7) 0.1434(3) 0.8232(3) 0.0505(13) Uani 1 1 d . . .

H15A H 0.4262 0.1656 0.8640 0.061 Uiso 1 1 calc R . .

H15B H 0.4930 0.1565 0.7958 0.061 Uiso 1 1 calc R . .

C16 C 0.3949(8) 0.0654(3) 0.8304(4) 0.0706(19) Uani 1 1 d . . .

H16A H 0.5073 0.0488 0.8481 0.106 Uiso 1 1 calc R . .

H16B H 0.3702 0.0435 0.7899 0.106 Uiso 1 1 calc R . .

H16C H 0.3039 0.0527 0.8580 0.106 Uiso 1 1 calc R . .

C17 C -0.0447(9) 0.0898(4) 0.7180(5) 0.103(4) Uani 1 1 d . . .

H17A H -0.0517 0.0561 0.6831 0.124 Uiso 1 1 calc R . .

H17B H 0.0550 0.0755 0.7461 0.124 Uiso 1 1 calc R . .

C18 C -0.1842(11) 0.0830(6) 0.7477(7) 0.164(7) Uani 1 1 d . . .

H18A H -0.1964 0.0341 0.7605 0.246 Uiso 1 1 calc R . .

H18B H -0.2852 0.0965 0.7207 0.246 Uiso 1 1 calc R . .

H18C H -0.1767 0.1133 0.7842 0.246 Uiso 1 1 calc R . .

C19 C 0.2977(10) 0.0884(5) 0.6349(5) 0.108(4) Uani 1 1 d . . .

H19A H 0.2461 0.1119 0.5974 0.130 Uiso 1 1 calc R . .

H19B H 0.2038 0.0623 0.6539 0.130 Uiso 1 1 calc R . .

C20 C 0.4240(16) 0.0393(5) 0.6166(5) 0.125(4) Uani 1 1 d . . .

H20A H 0.3693 0.0059 0.5871 0.187 Uiso 1 1 calc R . .

H20B H 0.4724 0.0140 0.6530 0.187 Uiso 1 1 calc R . .

H20C H 0.5172 0.0643 0.5971 0.187 Uiso 1 1 calc R . .


loop_

   _atom_site_aniso_label

   _atom_site_aniso_U_11

   _atom_site_aniso_U_22

   _atom_site_aniso_U_33

   _atom_site_aniso_U_23

   _atom_site_aniso_U_13

   _atom_site_aniso_U_12

Sb1 0.01922(16) 0.03782(19) 0.03204(17) 0.00136(11) 0.00035(10) 0.00146(10)

Sb2 0.01917(16) 0.0419(2) 0.04062(19) 0.00940(12) 0.00364(11) 0.00238(11)

O1 0.0348(18) 0.061(2) 0.0350(16) 0.0134(15) 0.0004(13) -0.0015(16)

O2 0.0233(14) 0.0358(16) 0.0431(17) -0.0030(13) 0.0010(12) -0.0006(12)

O3 0.0200(14) 0.0438(17) 0.0440(17) 0.0074(14) 0.0035(12) 0.0074(12)

O4 0.0289(16) 0.0456(18) 0.0377(17) -0.0076(13) 0.0035(13) 0.0063(13)

O5 0.0297(16) 0.0459(18) 0.0428(18) 0.0004(14) -0.0049(13) -0.0069(14)

O6 0.0233(15) 0.0439(18) 0.0380(17) -0.0061(13) 0.0031(12) -0.0015(12)

O7 0.0382(19) 0.055(2) 0.0464(19) 0.0115(16) 0.0148(15) 0.0161(16)

O8 0.0347(18) 0.072(3) 0.049(2) 0.0294(18) 0.0110(15) 0.0149(17)

O9 0.0213(15) 0.046(2) 0.078(3) 0.0237(18) -0.0026(15) -0.0045(14)

O10 0.0267(15) 0.0358(16) 0.0521(19) 0.0009(14) -0.0036(13) 0.0010(13)

N1 0.0230(18) 0.039(2) 0.0322(18) -0.0006(14) 0.0020(14) 0.0020(14)

N2 0.0253(18) 0.040(2) 0.0375(19) 0.0024(16) 0.0021(15) -0.0009(15)

C1 0.045(3) 0.069(4) 0.047(3) 0.009(3) 0.009(2) -0.011(3)

C2 0.053(4) 0.083(5) 0.097(5) 0.040(4) -0.015(4) -0.015(3)

C3 0.038(3) 0.086(5) 0.105(5) -0.062(4) -0.010(3) 0.010(3)

C4 0.052(3) 0.038(3) 0.062(3) -0.007(2) -0.003(3) -0.006(2)

C5 0.032(3) 0.047(3) 0.066(3) 0.010(2) 0.004(2) 0.010(2)

C6 0.045(3) 0.061(3) 0.058(3) 0.003(3) -0.001(2) 0.015(3)

C7 0.037(3) 0.063(3) 0.057(3) -0.025(3) 0.001(2) 0.008(2)

C8 0.079(5) 0.056(4) 0.101(6) -0.027(4) -0.027(4) 0.017(3)

C9 0.036(3) 0.058(3) 0.053(3) -0.001(2) -0.015(2) -0.004(2)

C10 0.051(3) 0.073(4) 0.058(3) -0.022(3) -0.012(3) 0.005(3)

C11 0.039(3) 0.051(3) 0.049(3) -0.011(2) -0.002(2) 0.003(2)

C12 0.058(4) 0.051(3) 0.073(4) -0.014(3) 0.009(3) -0.004(3)

C13 0.043(3) 0.067(4) 0.054(3) 0.010(3) 0.024(2) 0.012(3)

C14 0.043(3) 0.079(4) 0.048(3) -0.005(3) 0.007(2) 0.013(3)

C15 0.041(3) 0.062(3) 0.047(3) 0.011(2) -0.009(2) 0.003(2)

C16 0.047(3) 0.056(4) 0.105(5) 0.016(3) -0.025(3) 0.004(3)

C17 0.038(3) 0.083(5) 0.185(10) 0.077(6) -0.008(4) -0.013(3)

C18 0.050(5) 0.141(9) 0.303(17) 0.154(11) 0.027(7) 0.008(5)

C19 0.050(4) 0.108(7) 0.167(9) -0.088(7) 0.012(5) -0.019(4)

C20 0.179(11) 0.066(5) 0.121(8) -0.036(5) -0.055(7) 0.052(6)


_geom_special_details

;

   All esds (except the esd in the dihedral angle between two l.s. planes)

   are estimated using the full covariance matrix.  The cell esds are taken

   into account individually in the estimation of esds in distances, angles

   and torsion angles; correlations between esds in cell parameters are only

   used when they are defined by crystal symmetry.  An approximate (isotropic)

   treatment of cell esds is used for estimating esds involving l.s. planes.

;


loop_

   _geom_bond_atom_site_label_1

   _geom_bond_atom_site_label_2

   _geom_bond_distance

   _geom_bond_site_symmetry_2

   _geom_bond_publ_flag

Sb1 O1 1.950(3) . ?

Sb1 O5 1.960(3) . ?

Sb1 O4 1.969(3) . ?

Sb1 O2 1.975(3) . ?

Sb1 O3 1.975(3) . ?

Sb1 N1 2.145(4) . ?

Sb2 O8 1.945(3) . ?

Sb2 O7 1.957(3) . ?

Sb2 O6 1.967(3) . ?

Sb2 O10 1.970(3) . ?

Sb2 O9 1.975(3) . ?

Sb2 N2 2.158(4) . ?

O1 C1 1.426(6) . ?

O2 C3 1.397(6) . ?

O3 C5 1.441(6) . ?

O4 C7 1.429(6) . ?

O5 C9 1.425(6) . ?

O6 C11 1.435(6) . ?

O7 C13 1.424(6) . ?

O8 C15 1.433(6) . ?

O9 C17 1.435(7) . ?

O10 C19 1.388(8) . ?

C1 C2 1.492(10) . ?

C3 C4 1.491(8) . ?

C5 C6 1.506(8) . ?

C7 C8 1.491(10) . ?

C9 C10 1.491(8) . ?

C11 C12 1.513(8) . ?

C13 C14 1.486(9) . ?

C15 C16 1.498(8) . ?

C17 C18 1.295(12) . ?

C19 C20 1.425(11) . ?


loop_

   _geom_angle_atom_site_label_1

   _geom_angle_atom_site_label_2

   _geom_angle_atom_site_label_3

   _geom_angle

   _geom_angle_site_symmetry_1

   _geom_angle_site_symmetry_3

   _geom_angle_publ_flag

O1 Sb1 O5 94.14(15) . . ?

O1 Sb1 O4 96.24(15) . . ?

O5 Sb1 O4 90.65(14) . . ?

O1 Sb1 O2 95.53(14) . . ?

O5 Sb1 O2 169.15(13) . . ?

O4 Sb1 O2 83.41(13) . . ?

O1 Sb1 O3 92.69(14) . . ?

O5 Sb1 O3 89.50(14) . . ?

O4 Sb1 O3 171.04(13) . . ?

O2 Sb1 O3 94.96(13) . . ?

O1 Sb1 N1 176.63(14) . . ?

O5 Sb1 N1 83.30(14) . . ?

O4 Sb1 N1 86.01(14) . . ?

O2 Sb1 N1 87.22(14) . . ?

O3 Sb1 N1 85.11(14) . . ?

O8 Sb2 O7 94.75(16) . . ?

O8 Sb2 O6 95.24(16) . . ?

O7 Sb2 O6 90.26(15) . . ?

O8 Sb2 O10 95.40(15) . . ?

O7 Sb2 O10 168.85(14) . . ?

O6 Sb2 O10 84.23(13) . . ?

O8 Sb2 O9 93.10(16) . . ?

O7 Sb2 O9 89.72(16) . . ?

O6 Sb2 O9 171.63(15) . . ?

O10 Sb2 O9 94.32(15) . . ?

O8 Sb2 N2 177.30(14) . . ?

O7 Sb2 N2 83.34(15) . . ?

O6 Sb2 N2 86.69(14) . . ?

O10 Sb2 N2 86.66(14) . . ?

O9 Sb2 N2 85.00(15) . . ?

C1 O1 Sb1 122.8(3) . . ?

C3 O2 Sb1 124.8(3) . . ?

C5 O3 Sb1 123.7(3) . . ?

C7 O4 Sb1 120.4(3) . . ?

C9 O5 Sb1 123.4(3) . . ?

C11 O6 Sb2 119.8(3) . . ?

C13 O7 Sb2 122.8(3) . . ?

C15 O8 Sb2 121.9(3) . . ?

C17 O9 Sb2 123.4(4) . . ?

C19 O10 Sb2 124.2(4) . . ?

O1 C1 C2 110.7(6) . . ?

O2 C3 C4 111.4(5) . . ?

O3 C5 C6 111.0(5) . . ?

O4 C7 C8 111.6(5) . . ?

O5 C9 C10 109.5(5) . . ?

O6 C11 C12 110.8(5) . . ?

O7 C13 C14 109.3(5) . . ?

O8 C15 C16 109.8(5) . . ?

C18 C17 O9 117.9(8) . . ?

O10 C19 C20 115.4(7) . . ?


_diffrn_measured_fraction_theta_max    0.995

_diffrn_reflns_theta_full              27.46

_diffrn_measured_fraction_theta_full   0.995

_refine_diff_density_max    1.004

_refine_diff_density_min   -0.924

_refine_diff_density_rms    0.109

#===END

data_k00kcm37


_audit_creation_method            SHELXL-97

_chemical_name_systematic

;

   ?

;

_chemical_name_common             ?

_chemical_melting_point           ?

_chemical_formula_moiety          ?

_chemical_formula_sum

   'C45 H54 Cl15 N9 Sb2'

_chemical_formula_weight          1496.22


loop_

   _atom_type_symbol

   _atom_type_description

   _atom_type_scat_dispersion_real

   _atom_type_scat_dispersion_imag

   _atom_type_scat_source

   'C'  'C'   0.0033   0.0016

   'International Tables Vol C Tables 4.2.6.8 and 6.1.1.4'

   'H'  'H'   0.0000   0.0000

   'International Tables Vol C Tables 4.2.6.8 and 6.1.1.4'

   'N'  'N'   0.0061   0.0033

   'International Tables Vol C Tables 4.2.6.8 and 6.1.1.4'

   'Cl'  'Cl'   0.1484   0.1585

   'International Tables Vol C Tables 4.2.6.8 and 6.1.1.4'

   'Sb'  'Sb'  -0.5866   1.5461

   'International Tables Vol C Tables 4.2.6.8 and 6.1.1.4'


_symmetry_cell_setting            Triclinic

_symmetry_space_group_name_H-M    P-1


loop_

   _symmetry_equiv_pos_as_xyz

   'x, y, z'

   '-x, -y, -z'


_cell_length_a                    13.4300(2)

_cell_length_b                    14.4180(2)

_cell_length_c                    17.4180(3)

_cell_angle_alpha                 82.7650(7)

_cell_angle_beta                  77.5570(7)

_cell_angle_gamma                 70.7670(7)

_cell_volume                      3104.14(8)

_cell_formula_units_Z             2

_cell_measurement_temperature     150(2)

_cell_measurement_reflns_used     25

_cell_measurement_theta_min       12

_cell_measurement_theta_max       18


_exptl_crystal_description        Block

_exptl_crystal_colour             Colourless

_exptl_crystal_size_max           0.50

_exptl_crystal_size_mid           0.40

_exptl_crystal_size_min           0.20

_exptl_crystal_density_meas       ?

_exptl_crystal_density_diffrn     1.601

_exptl_crystal_density_method     'not measured'

_exptl_crystal_F_000              1488

_exptl_absorpt_coefficient_mu     1.555

_exptl_absorpt_correction_type    'none'

_exptl_absorpt_correction_T_min   ?

_exptl_absorpt_correction_T_max   ?


_exptl_special_details

;

   ?

;


_diffrn_ambient_temperature       150(2)

_diffrn_radiation_wavelength      0.71069

_diffrn_radiation_type            MoK\a

_diffrn_radiation_source          'fine-focus sealed tube'

_diffrn_radiation_monochromator   graphite

_diffrn_measurement_device_type   KappaCCD

_diffrn_measurement_method        KappaCCD

_diffrn_detector_area_resol_mean  ?

_diffrn_standards_number          ?

_diffrn_standards_interval_count  ?

_diffrn_standards_interval_time   ?

_diffrn_standards_decay_%         ?

_diffrn_reflns_number             51302

_diffrn_reflns_av_R_equivalents   0.0626

_diffrn_reflns_av_sigmaI/netI     0.0775

_diffrn_reflns_limit_h_min        0

_diffrn_reflns_limit_h_max        17

_diffrn_reflns_limit_k_min        -17

_diffrn_reflns_limit_k_max        18

_diffrn_reflns_limit_l_min        -21

_diffrn_reflns_limit_l_max        22

_diffrn_reflns_theta_min          3.62

_diffrn_reflns_theta_max          27.47

_reflns_number_total              14158

_reflns_number_gt                 9279

_reflns_threshold_expression      >2sigma(I)


_computing_data_collection        ?

_computing_cell_refinement        ?

_computing_data_reduction         'Denzo and Scalepack (otwinowski &
Minor, 1997

_computing_structure_solution     'SHELXS-97 (Sheldrick, 1990)'

_computing_structure_refinement   'SHELXL-97 (Sheldrick, 1997)'

_computing_molecular_graphics     'ORTEX (P.McArdle, 1995)'

_computing_publication_material   'SHELXL-97/2 (Sheldrick,1997)'


_refine_special_details

;

   Refinement of F^2^ against ALL reflections.  The weighted R-factor wR and

   goodness of fit S are based on F^2^, conventional R-factors R are based

   on F, with F set to zero for negative F^2^. The threshold expression of

   F^2^ > 2sigma(F^2^) is used only for calculating R-factors(gt) etc. and is

   not relevant to the choice of reflections for refinement.  R-factors based

   on F^2^ are statistically about twice as large as those based on F, and R-

   factors based on ALL data will be even larger.

;


_refine_ls_structure_factor_coef  Fsqd

_refine_ls_matrix_type            full

_refine_ls_weighting_scheme       calc

_refine_ls_weighting_details

   'calc w=1/[\s^2^(Fo^2^)+(0.0775P)^2^+1.6441P] where P=(Fo^2^+2Fc^2^)/3'

_atom_sites_solution_primary      direct

_atom_sites_solution_secondary    difmap

_atom_sites_solution_hydrogens    geom

_refine_ls_hydrogen_treatment     mixed

_refine_ls_extinction_method      SHELXL

_refine_ls_extinction_coef        0.00098(14)

_refine_ls_extinction_expression

   'Fc^*^=kFc[1+0.001xFc^2^\l^3^/sin(2\q)]^-1/4^'

_refine_ls_number_reflns          14158

_refine_ls_number_parameters      644

_refine_ls_number_restraints      0

_refine_ls_R_factor_all           0.0842

_refine_ls_R_factor_gt            0.0417

_refine_ls_wR_factor_ref          0.1281

_refine_ls_wR_factor_gt           0.1035

_refine_ls_goodness_of_fit_ref    0.844

_refine_ls_restrained_S_all       0.844

_refine_ls_shift/su_max           0.001

_refine_ls_shift/su_mean          0.000


loop_

   _atom_site_label

   _atom_site_type_symbol

   _atom_site_fract_x

   _atom_site_fract_y

   _atom_site_fract_z

   _atom_site_U_iso_or_equiv

   _atom_site_adp_type

   _atom_site_occupancy

   _atom_site_symetry_multiplicity

   _atom_site_calc_flag

   _atom_site_refinement_flags

   _atom_site_disorder_assembly

   _atom_site_disorder_group

Sb1A Sb 0.685935(19) 0.922590(18) 0.072043(14) 0.02041(9) Uani 1 1 d . . .

Sb1B Sb 0.80978(2) 0.085342(19) 0.420982(15) 0.02326(9) Uani 1 1 d . . .

Cl1A Cl 0.84336(8) 0.86746(8) 0.13924(6) 0.0290(2) Uani 1 1 d . . .

Cl2A Cl 0.59112(8) 1.06022(7) 0.16172(6) 0.0286(2) Uani 1 1 d . . .

Cl3A Cl 0.60060(9) 0.80469(8) 0.16181(6) 0.0344(3) Uani 1 1 d . . .

Cl4A Cl 0.76467(8) 1.05647(7) -0.03051(6) 0.0289(2) Uani 1 1 d . . .

Cl5A Cl 0.80402(8) 0.78052(7) -0.04509(6) 0.0310(2) Uani 1 1 d . . .

Cl6A Cl 0.5000 1.0000 0.0000 0.0309(3) Uani 1 2 d S . .

Cl1B Cl 0.65487(8) 0.14706(8) 0.35171(6) 0.0339(3) Uani 1 1 d . . .

Cl2B Cl 0.90422(8) -0.03934(8) 0.32427(6) 0.0307(2) Uani 1 1 d . . .

Cl3B Cl 0.72284(9) -0.03602(8) 0.50380(6) 0.0351(3) Uani 1 1 d . . .

Cl4B Cl 0.89290(9) 0.21737(9) 0.32380(7) 0.0413(3) Uani 1 1 d . . .

Cl5B Cl 0.67474(9) 0.24309(8) 0.53189(7) 0.0374(3) Uani 1 1 d . . .

Cl6B Cl 1.0000 0.0000 0.5000 0.0365(4) Uani 1 2 d S . .

Cl7 Cl -0.20176(8) 1.42415(8) -0.09221(6) 0.0308(2) Uani 1 1 d . . .

Cl8 Cl 1.31003(10) 0.41728(9) 0.42940(7) 0.0436(3) Uani 1 1 d . . .

Cl9 Cl -0.06792(9) 0.56877(9) 0.30001(7) 0.0410(3) Uani 1 1 d . . .

Cl10 Cl 0.56965(9) 0.37617(8) 0.17168(7) 0.0406(3) Uani 1 1 d . . .

N1A N 0.7635(3) 0.9337(3) -0.1837(2) 0.0366(9) Uani 1 1 d . . .

H1A H 0.7701 0.8980 -0.1391 0.044 Uiso 1 1 calc R . .

N2A N 0.5550(3) 1.2330(3) -0.0064(2) 0.0333(9) Uani 1 1 d . . .

H2A H 0.5968 1.1723 0.0004 0.040 Uiso 1 1 calc R . .

N1B N 0.8775(3) 0.3022(3) 0.5130(2) 0.0478(11) Uani 1 1 d . . .

H1B H 0.8156 0.2908 0.5199 0.057 Uiso 1 1 calc R . .

N2B N 0.6651(5) 0.3993(4) 0.3481(3) 0.0732(16) Uani 1 1 d . . .

H2B H 0.6978 0.3354 0.3476 0.088 Uiso 1 1 calc R . .

N3 N 0.0066(3) 1.4621(3) -0.1005(2) 0.0323(9) Uani 1 1 d . . .

H3 H -0.0489 1.4404 -0.0933 0.039 Uiso 1 1 calc R . .

N4 N 0.1001(3) 0.6667(3) 0.2734(2) 0.0372(9) Uani 1 1 d . . .

H4 H 0.0444 0.6449 0.2843 0.045 Uiso 1 1 calc R . .

N5 N 0.7755(3) 1.2043(3) 0.12799(19) 0.0294(8) Uani 1 1 d . . .

H5 H 0.7108 1.2341 0.1536 0.035 Uiso 1 1 calc R . .

N6 N 0.3752(3) 0.3127(3) 0.2420(2) 0.0387(10) Uani 1 1 d . . .

H6 H 0.4344 0.3268 0.2202 0.046 Uiso 1 1 calc R . .

N7 N 1.3717(4) 0.2358(3) 0.5415(2) 0.0450(11) Uani 1 1 d . . .

H7 H 1.3723 0.2791 0.5011 0.054 Uiso 1 1 calc R . .

C1A C 0.6666(4) 0.9939(4) -0.1930(3) 0.0417(12) Uani 1 1 d . . .

H1A1 H 0.6063 0.9984 -0.1518 0.050 Uiso 1 1 calc R . .

C2A C 0.6551(4) 1.0487(4) -0.2621(3) 0.0440(13) Uani 1 1 d . . .

H2A1 H 0.5865 1.0910 -0.2699 0.053 Uiso 1 1 calc R . .

C3A C 0.7436(4) 1.0421(4) -0.3204(3) 0.0436(13) Uani 1 1 d . . .

H3A H 0.7371 1.0805 -0.3687 0.052 Uiso 1 1 calc R . .

C4A C 0.8415(4) 0.9798(4) -0.3083(3) 0.0434(13) Uani 1 1 d . . .

H4A H 0.9032 0.9743 -0.3484 0.052 Uiso 1 1 calc R . .

C5A C 0.8501(4) 0.9259(4) -0.2391(3) 0.0389(11) Uani 1 1 d . . .

H5A H 0.9179 0.8827 -0.2304 0.047 Uiso 1 1 calc R . .

C6A C 0.4517(4) 1.2551(3) 0.0256(3) 0.0337(10) Uani 1 1 d . . .

H6A H 0.4237 1.2062 0.0552 0.040 Uiso 1 1 calc R . .

C7A C 0.3853(3) 1.3500(3) 0.0152(3) 0.0316(10) Uani 1 1 d . . .

H7A H 0.3112 1.3675 0.0381 0.038 Uiso 1 1 calc R . .

C8A C 0.4276(3) 1.4188(3) -0.0285(3) 0.0325(10) Uani 1 1 d . . .

H8A H 0.3824 1.4842 -0.0365 0.039 Uiso 1 1 calc R . .

C9A C 0.5357(3) 1.3932(3) -0.0609(3) 0.0338(10) Uani 1 1 d . . .

H9A H 0.5655 1.4405 -0.0913 0.041 Uiso 1 1 calc R . .

C10A C 0.5986(3) 1.2992(3) -0.0486(3) 0.0348(11) Uani 1 1 d . . .

H10A H 0.6733 1.2804 -0.0699 0.042 Uiso 1 1 calc R . .

C1B C 0.9569(4) 0.2371(4) 0.5428(3) 0.0455(13) Uani 1 1 d . . .

H1B1 H 0.9468 0.1792 0.5712 0.055 Uiso 1 1 calc R . .

C2B C 1.0522(4) 0.2533(4) 0.5329(3) 0.0474(13) Uani 1 1 d . . .

H2B1 H 1.1098 0.2071 0.5542 0.057 Uiso 1 1 calc R . .

C3B C 1.0652(4) 0.3377(4) 0.4914(3) 0.0481(13) Uani 1 1 d . . .

H3B H 1.1319 0.3500 0.4843 0.058 Uiso 1 1 calc R . .

C4B C 0.9827(5) 0.4034(4) 0.4605(3) 0.0520(14) Uani 1 1 d . . .

H4B H 0.9912 0.4613 0.4310 0.062 Uiso 1 1 calc R . .

C5B C 0.8878(5) 0.3840(4) 0.4732(3) 0.0525(15) Uani 1 1 d . . .

H5B H 0.8285 0.4295 0.4533 0.063 Uiso 1 1 calc R . .

C6B C 0.5590(6) 0.4334(6) 0.3821(3) 0.072(2) Uani 1 1 d . . .

H6B H 0.5202 0.3884 0.4020 0.086 Uiso 1 1 calc R . .

C7B C 0.5112(4) 0.5274(6) 0.3872(3) 0.0648(19) Uani 1 1 d . . .

H7B H 0.4391 0.5505 0.4144 0.078 Uiso 1 1 calc R . .

C8B C 0.5639(4) 0.5935(4) 0.3537(3) 0.0529(14) Uani 1 1 d . . .

H8B H 0.5279 0.6622 0.3554 0.063 Uiso 1 1 calc R . .

C9B C 0.6694(4) 0.5590(4) 0.3176(3) 0.0467(13) Uani 1 1 d . . .

H9B H 0.7072 0.6037 0.2941 0.056 Uiso 1 1 calc R . .

C10B C 0.7193(4) 0.4608(4) 0.3158(3) 0.0448(12) Uani 1 1 d . . .

H10B H 0.7927 0.4362 0.2916 0.054 Uiso 1 1 calc R . .

C31 C 0.1054(4) 1.3969(3) -0.1056(3) 0.0392(12) Uani 1 1 d . . .

H31 H 0.1149 1.3284 -0.1027 0.047 Uiso 1 1 calc R . .

C32 C 0.1921(4) 1.4295(4) -0.1148(3) 0.0412(12) Uani 1 1 d . . .

H32 H 0.2621 1.3837 -0.1170 0.049 Uiso 1 1 calc R . .

C33 C 0.1778(4) 1.5279(4) -0.1208(3) 0.0414(12) Uani 1 1 d . . .

H33 H 0.2379 1.5509 -0.1277 0.050 Uiso 1 1 calc R . .

C34 C 0.0748(4) 1.5950(4) -0.1169(3) 0.0456(13) Uani 1 1 d . . .

H34 H 0.0635 1.6639 -0.1216 0.055 Uiso 1 1 calc R . .

C35 C -0.0096(4) 1.5581(4) -0.1061(3) 0.0389(11) Uani 1 1 d . . .

H35 H -0.0807 1.6021 -0.1026 0.047 Uiso 1 1 calc R . .

C41 C 0.0908(4) 0.7522(4) 0.2327(3) 0.0439(13) Uani 1 1 d . . .

H41 H 0.0263 0.7886 0.2146 0.053 Uiso 1 1 calc R . .

C42 C 0.1801(5) 0.7873(4) 0.2172(3) 0.0558(16) Uani 1 1 d . . .

H42 H 0.1770 0.8487 0.1888 0.067 Uiso 1 1 calc R . .

C43 C 0.2712(5) 0.7310(5) 0.2439(4) 0.0599(16) Uani 1 1 d . . .

H43 H 0.3321 0.7534 0.2341 0.072 Uiso 1 1 calc R . .

C44 C 0.2752(5) 0.6429(5) 0.2847(3) 0.0609(16) Uani 1 1 d . . .

H44 H 0.3386 0.6036 0.3030 0.073 Uiso 1 1 calc R . .

C45 C 0.1882(4) 0.6128(4) 0.2985(3) 0.0460(13) Uani 1 1 d . . .

H45 H 0.1903 0.5515 0.3268 0.055 Uiso 1 1 calc R . .

C51 C 0.8332(3) 1.1194(3) 0.1591(3) 0.0345(11) Uani 1 1 d . . .

H51 H 0.8041 1.0918 0.2077 0.041 Uiso 1 1 calc R . .

C52 C 0.9354(3) 1.0718(3) 0.1205(3) 0.0330(10) Uani 1 1 d . . .

H52 H 0.9775 1.0115 0.1420 0.040 Uiso 1 1 calc R . .

C53 C 0.9753(3) 1.1138(3) 0.0496(3) 0.0319(10) Uani 1 1 d . . .

H53 H 1.0458 1.0828 0.0224 0.038 Uiso 1 1 calc R . .

C54 C 0.9124(3) 1.2008(3) 0.0184(2) 0.0305(10) Uani 1 1 d . . .

H54 H 0.9389 1.2288 -0.0309 0.037 Uiso 1 1 calc R . .

C55 C 0.8126(3) 1.2461(3) 0.0587(2) 0.0287(10) Uani 1 1 d . . .

H55 H 0.7693 1.3066 0.0383 0.034 Uiso 1 1 calc R . .

C61 C 0.3828(4) 0.2311(3) 0.2892(3) 0.0427(12) Uani 1 1 d . . .

H61 H 0.4506 0.1903 0.2998 0.051 Uiso 1 1 calc R . .

C62 C 0.2907(5) 0.2069(4) 0.3224(3) 0.0464(13) Uani 1 1 d . . .

H62 H 0.2943 0.1486 0.3553 0.056 Uiso 1 1 calc R . .

C63 C 0.1939(4) 0.2690(4) 0.3067(3) 0.0510(14) Uani 1 1 d . . .

H63 H 0.1297 0.2534 0.3287 0.061 Uiso 1 1 calc R . .

C64 C 0.1896(4) 0.3521(4) 0.2602(3) 0.0543(15) Uani 1 1 d . . .

H64 H 0.1225 0.3959 0.2506 0.065 Uiso 1 1 calc R . .

C65 C 0.2832(4) 0.3729(4) 0.2268(3) 0.0462(13) Uani 1 1 d . . .

H65 H 0.2812 0.4304 0.1929 0.055 Uiso 1 1 calc R . .

C71 C 1.2899(4) 0.2548(4) 0.5997(3) 0.0438(12) Uani 1 1 d . . .

H71 H 1.2339 0.3156 0.5988 0.053 Uiso 1 1 calc R . .

C72 C 1.2846(4) 0.1890(4) 0.6607(3) 0.0422(12) Uani 1 1 d . . .

H72 H 1.2243 0.2029 0.7026 0.051 Uiso 1 1 calc R . .

C73 C 1.3647(4) 0.1027(4) 0.6631(3) 0.0436(12) Uani 1 1 d . . .

H73 H 1.3604 0.0561 0.7064 0.052 Uiso 1 1 calc R . .

C74 C 1.4533(4) 0.0823(4) 0.6020(3) 0.0530(15) Uani 1 1 d . . .

H74 H 1.5103 0.0221 0.6026 0.064 Uiso 1 1 calc R . .

C75 C 1.4557(4) 0.1520(5) 0.5410(3) 0.0512(15) Uani 1 1 d . . .

H75 H 1.5155 0.1416 0.4988 0.061 Uiso 1 1 calc R . .


loop_

   _atom_site_aniso_label

   _atom_site_aniso_U_11

   _atom_site_aniso_U_22

   _atom_site_aniso_U_33

   _atom_site_aniso_U_23

   _atom_site_aniso_U_13

   _atom_site_aniso_U_12

Sb1A 0.01841(15) 0.01950(15) 0.02116(15) -0.00152(11) -0.00324(10) -0.00320(11)

Sb1B 0.02060(15) 0.02476(16) 0.02193(15) -0.00177(11) -0.00285(11) -0.00435(12)

Cl1A 0.0247(5) 0.0322(6) 0.0289(5) -0.0011(4) -0.0069(4) -0.0064(4)

Cl2A 0.0288(5) 0.0265(5) 0.0270(5) -0.0065(4) -0.0038(4) -0.0031(4)

Cl3A 0.0335(6) 0.0300(6) 0.0362(6) 0.0004(5) -0.0006(5) -0.0099(5)

Cl4A 0.0227(5) 0.0249(5) 0.0367(6) -0.0038(4) -0.0046(4) -0.0041(4)

Cl5A 0.0332(6) 0.0240(5) 0.0320(5) -0.0011(4) -0.0023(4) -0.0063(4)

Cl6A 0.0315(8) 0.0336(8) 0.0296(7) 0.0005(6) -0.0073(6) -0.0124(7)

Cl1B 0.0278(6) 0.0405(6) 0.0301(5) -0.0012(5) -0.0089(4) -0.0045(5)

Cl2B 0.0330(6) 0.0288(6) 0.0247(5) -0.0034(4) -0.0042(4) -0.0022(5)

Cl3B 0.0379(6) 0.0376(6) 0.0304(6) -0.0014(5) -0.0055(5) -0.0131(5)

Cl4B 0.0309(6) 0.0383(7) 0.0461(7) -0.0047(5) 0.0012(5) -0.0038(5)

Cl5B 0.0329(6) 0.0372(7) 0.0408(6) -0.0062(5) -0.0017(5) -0.0112(5)

Cl6B 0.0419(9) 0.0420(9) 0.0269(8) -0.0050(7) -0.0040(7) -0.0153(7)

Cl7 0.0266(5) 0.0287(6) 0.0339(6) 0.0020(4) -0.0027(4) -0.0075(4)

Cl8 0.0472(7) 0.0399(7) 0.0417(7) 0.0073(5) -0.0054(5) -0.0164(6)

Cl9 0.0312(6) 0.0504(7) 0.0374(6) 0.0022(5) -0.0031(5) -0.0111(5)

Cl10 0.0313(6) 0.0335(6) 0.0466(7) 0.0049(5) 0.0003(5) -0.0036(5)

N1A 0.052(3) 0.038(2) 0.0225(19) 0.0012(16) -0.0076(18) -0.017(2)

N2A 0.028(2) 0.0199(19) 0.047(2) -0.0008(17) -0.0119(17) 0.0015(15)

N1B 0.035(2) 0.065(3) 0.046(3) -0.019(2) -0.002(2) -0.019(2)

N2B 0.124(5) 0.045(3) 0.045(3) 0.001(2) -0.023(3) -0.015(3)

N3 0.032(2) 0.034(2) 0.034(2) -0.0028(17) -0.0076(16) -0.0129(17)

N4 0.038(2) 0.042(2) 0.031(2) -0.0081(18) 0.0010(17) -0.0144(19)

N5 0.0220(18) 0.036(2) 0.0279(19) -0.0067(16) -0.0023(15) -0.0066(16)

N6 0.040(2) 0.042(2) 0.032(2) -0.0087(19) 0.0032(18) -0.015(2)

N7 0.061(3) 0.050(3) 0.034(2) 0.010(2) -0.013(2) -0.032(2)

C1A 0.030(3) 0.057(3) 0.037(3) -0.016(2) 0.009(2) -0.018(2)

C2A 0.035(3) 0.043(3) 0.050(3) -0.015(2) -0.017(2) 0.004(2)

C3A 0.072(4) 0.039(3) 0.025(2) 0.000(2) -0.013(2) -0.022(3)

C4A 0.044(3) 0.062(4) 0.029(2) -0.010(2) 0.008(2) -0.030(3)

C5A 0.027(2) 0.041(3) 0.046(3) -0.017(2) -0.007(2) -0.003(2)

C6A 0.036(3) 0.029(2) 0.038(3) 0.000(2) -0.007(2) -0.013(2)

C7A 0.025(2) 0.030(2) 0.037(2) -0.006(2) -0.0019(18) -0.0050(19)

C8A 0.032(3) 0.023(2) 0.038(2) -0.0014(19) -0.010(2) -0.0001(19)

C9A 0.037(3) 0.027(2) 0.037(2) 0.005(2) -0.007(2) -0.011(2)

C10A 0.022(2) 0.040(3) 0.040(3) -0.006(2) -0.0055(19) -0.006(2)

C1B 0.065(4) 0.035(3) 0.041(3) -0.001(2) -0.008(3) -0.023(3)

C2B 0.036(3) 0.041(3) 0.054(3) -0.002(3) -0.012(2) 0.004(2)

C3B 0.047(3) 0.071(4) 0.035(3) -0.002(3) -0.006(2) -0.031(3)

C4B 0.085(4) 0.043(3) 0.040(3) 0.010(2) -0.022(3) -0.034(3)

C5B 0.056(4) 0.045(3) 0.052(3) -0.012(3) -0.032(3) 0.007(3)

C6B 0.097(6) 0.112(6) 0.037(3) -0.011(4) 0.006(3) -0.084(5)

C7B 0.031(3) 0.130(6) 0.040(3) -0.018(4) 0.002(2) -0.034(4)

C8B 0.042(3) 0.045(3) 0.062(4) -0.014(3) -0.012(3) 0.004(3)

C9B 0.043(3) 0.047(3) 0.057(3) -0.008(3) -0.003(2) -0.026(3)

C10B 0.035(3) 0.042(3) 0.048(3) -0.007(2) -0.007(2) 0.002(2)

C31 0.048(3) 0.024(2) 0.044(3) 0.001(2) -0.021(2) -0.003(2)

C32 0.031(3) 0.035(3) 0.052(3) -0.010(2) -0.015(2) 0.003(2)

C33 0.034(3) 0.042(3) 0.054(3) -0.011(2) -0.014(2) -0.014(2)

C34 0.052(3) 0.025(3) 0.066(3) -0.007(2) -0.026(3) -0.008(2)

C35 0.030(3) 0.041(3) 0.044(3) -0.016(2) -0.009(2) -0.003(2)

C41 0.050(3) 0.037(3) 0.032(3) -0.008(2) -0.004(2) 0.004(2)

C42 0.095(5) 0.028(3) 0.041(3) -0.007(2) -0.001(3) -0.020(3)

C43 0.049(4) 0.070(4) 0.069(4) -0.027(3) 0.000(3) -0.029(3)

C44 0.057(4) 0.061(4) 0.068(4) -0.012(3) -0.030(3) -0.007(3)

C45 0.060(4) 0.042(3) 0.035(3) 0.001(2) -0.018(2) -0.010(3)

C51 0.033(3) 0.043(3) 0.026(2) 0.004(2) -0.0081(19) -0.011(2)

C52 0.034(3) 0.028(2) 0.038(2) 0.003(2) -0.014(2) -0.008(2)

C53 0.029(2) 0.031(3) 0.035(2) -0.007(2) -0.0014(19) -0.010(2)

C54 0.028(2) 0.034(3) 0.030(2) 0.0018(19) -0.0014(18) -0.014(2)

C55 0.027(2) 0.025(2) 0.031(2) 0.0016(18) -0.0082(18) -0.0041(18)

C61 0.049(3) 0.031(3) 0.041(3) -0.007(2) -0.017(2) 0.004(2)

C62 0.070(4) 0.035(3) 0.033(3) 0.002(2) 0.003(2) -0.023(3)

C63 0.043(3) 0.064(4) 0.049(3) -0.024(3) 0.009(3) -0.024(3)

C64 0.041(3) 0.057(4) 0.060(4) -0.031(3) -0.021(3) 0.009(3)

C65 0.063(4) 0.033(3) 0.032(3) 0.001(2) -0.007(2) -0.003(3)

C71 0.042(3) 0.046(3) 0.044(3) -0.004(2) -0.014(2) -0.009(2)

C72 0.032(3) 0.059(4) 0.038(3) -0.009(3) 0.000(2) -0.018(2)

C73 0.068(4) 0.045(3) 0.027(2) 0.004(2) -0.018(2) -0.027(3)

C74 0.049(3) 0.046(3) 0.062(4) -0.018(3) -0.032(3) 0.007(3)

C75 0.033(3) 0.084(5) 0.046(3) -0.023(3) 0.007(2) -0.032(3)


_geom_special_details

;

   All esds (except the esd in the dihedral angle between two l.s. planes)

   are estimated using the full covariance matrix.  The cell esds are taken

   into account individually in the estimation of esds in distances, angles

   and torsion angles; correlations between esds in cell parameters are only

   used when they are defined by crystal symmetry.  An approximate (isotropic)

   treatment of cell esds is used for estimating esds involving l.s. planes.

;


loop_

   _geom_bond_atom_site_label_1

   _geom_bond_atom_site_label_2

   _geom_bond_distance

   _geom_bond_site_symmetry_2

   _geom_bond_publ_flag

Sb1A Cl1A 2.4893(10) . ?

Sb1A Cl2A 2.5016(10) . ?

Sb1A Cl3A 2.5475(11) . ?

Sb1A Cl4A 2.7744(11) . ?

Sb1A Cl6A 2.8666(2) . ?

Sb1A Cl5A 2.8968(10) . ?

Sb1B Cl2B 2.4532(10) . ?

Sb1B Cl1B 2.4834(10) . ?

Sb1B Cl3B 2.5476(11) . ?

Sb1B Cl4B 2.7403(12) . ?

Cl6A Sb1A 2.8666(2) 2_675 ?

N1A C5A 1.325(6) . ?

N1A C1A 1.336(6) . ?

N2A C6A 1.325(5) . ?

N2A C10A 1.342(6) . ?

N1B C1B 1.321(6) . ?

N1B C5B 1.322(7) . ?

N2B C10B 1.326(7) . ?

N2B C6B 1.367(8) . ?

N3 C35 1.322(6) . ?

N3 C31 1.341(6) . ?

N4 C45 1.313(6) . ?

N4 C41 1.324(6) . ?

N5 C51 1.335(5) . ?

N5 C55 1.350(5) . ?

N6 C65 1.315(6) . ?

N6 C61 1.335(6) . ?

N7 C71 1.305(6) . ?

N7 C75 1.354(7) . ?

C1A C2A 1.364(7) . ?

C2A C3A 1.372(7) . ?

C3A C4A 1.368(7) . ?

C4A C5A 1.355(7) . ?

C6A C7A 1.380(6) . ?

C7A C8A 1.371(6) . ?

C8A C9A 1.382(6) . ?

C9A C10A 1.359(6) . ?

C1B C2B 1.346(7) . ?

C2B C3B 1.377(7) . ?

C3B C4B 1.360(7) . ?

C4B C5B 1.360(7) . ?

C6B C7B 1.300(9) . ?

C7B C8B 1.369(8) . ?

C8B C9B 1.371(7) . ?

C9B C10B 1.353(7) . ?

C31 C32 1.365(7) . ?

C32 C33 1.361(6) . ?

C33 C34 1.395(6) . ?

C34 C35 1.372(7) . ?

C41 C42 1.412(8) . ?

C42 C43 1.367(8) . ?

C43 C44 1.366(8) . ?

C44 C45 1.342(8) . ?

C51 C52 1.380(6) . ?

C52 C53 1.384(6) . ?

C53 C54 1.382(6) . ?

C54 C55 1.360(6) . ?

C61 C62 1.382(7) . ?

C62 C63 1.375(7) . ?

C63 C64 1.352(8) . ?

C64 C65 1.377(7) . ?

C71 C72 1.339(7) . ?

C72 C73 1.352(7) . ?

C73 C74 1.392(7) . ?

C74 C75 1.370(8) . ?


loop_

   _geom_angle_atom_site_label_1

   _geom_angle_atom_site_label_2

   _geom_angle_atom_site_label_3

   _geom_angle

   _geom_angle_site_symmetry_1

   _geom_angle_site_symmetry_3

   _geom_angle_publ_flag

Cl1A Sb1A Cl2A 91.83(3) . . ?

Cl1A Sb1A Cl3A 90.99(4) . . ?

Cl2A Sb1A Cl3A 92.39(3) . . ?

Cl1A Sb1A Cl4A 93.37(3) . . ?

Cl2A Sb1A Cl4A 87.07(3) . . ?

Cl3A Sb1A Cl4A 175.63(3) . . ?

Cl1A Sb1A Cl6A 175.67(3) . . ?

Cl2A Sb1A Cl6A 84.05(2) . . ?

Cl3A Sb1A Cl6A 90.50(3) . . ?

Cl4A Sb1A Cl6A 85.13(2) . . ?

Cl1A Sb1A Cl5A 89.01(3) . . ?

Cl2A Sb1A Cl5A 173.12(3) . . ?

Cl3A Sb1A Cl5A 94.42(3) . . ?

Cl4A Sb1A Cl5A 86.06(3) . . ?

Cl6A Sb1A Cl5A 94.92(2) . . ?

Cl2B Sb1B Cl1B 90.87(4) . . ?

Cl2B Sb1B Cl3B 89.47(4) . . ?

Cl1B Sb1B Cl3B 89.34(4) . . ?

Cl2B Sb1B Cl4B 89.22(3) . . ?

Cl1B Sb1B Cl4B 86.41(4) . . ?

Cl3B Sb1B Cl4B 175.54(4) . . ?

Sb1A Cl6A Sb1A 180.000(11) 2_675 . ?

C5A N1A C1A 122.4(4) . . ?

C6A N2A C10A 122.9(4) . . ?

C1B N1B C5B 122.2(5) . . ?

C10B N2B C6B 121.1(5) . . ?

C35 N3 C31 121.9(4) . . ?

C45 N4 C41 123.5(5) . . ?

C51 N5 C55 122.5(4) . . ?

C65 N6 C61 122.9(4) . . ?

C71 N7 C75 122.4(4) . . ?

N1A C1A C2A 119.4(4) . . ?

C1A C2A C3A 119.4(4) . . ?

C4A C3A C2A 119.3(4) . . ?

C5A C4A C3A 119.9(4) . . ?

N1A C5A C4A 119.7(4) . . ?

N2A C6A C7A 119.1(4) . . ?

C8A C7A C6A 119.3(4) . . ?

C7A C8A C9A 120.1(4) . . ?

C10A C9A C8A 118.8(4) . . ?

N2A C10A C9A 119.9(4) . . ?

N1B C1B C2B 119.7(5) . . ?

C1B C2B C3B 119.2(5) . . ?

C4B C3B C2B 120.2(5) . . ?

C5B C4B C3B 118.1(5) . . ?

N1B C5B C4B 120.5(5) . . ?

C7B C6B N2B 120.2(6) . . ?

C6B C7B C8B 120.5(5) . . ?

C7B C8B C9B 119.0(5) . . ?

C10B C9B C8B 119.6(5) . . ?

N2B C10B C9B 119.4(5) . . ?

N3 C31 C32 119.7(4) . . ?

C33 C32 C31 119.6(4) . . ?

C32 C33 C34 120.1(4) . . ?

C35 C34 C33 117.8(5) . . ?

N3 C35 C34 120.9(4) . . ?

N4 C41 C42 117.7(5) . . ?

C43 C42 C41 118.4(5) . . ?

C42 C43 C44 120.5(5) . . ?

C45 C44 C43 119.0(5) . . ?

N4 C45 C44 120.9(5) . . ?

N5 C51 C52 119.7(4) . . ?

C51 C52 C53 118.7(4) . . ?

C54 C53 C52 120.0(4) . . ?

C55 C54 C53 119.6(4) . . ?

N5 C55 C54 119.4(4) . . ?

N6 C61 C62 119.1(5) . . ?

C63 C62 C61 118.7(5) . . ?

C64 C63 C62 120.2(5) . . ?

C63 C64 C65 119.6(5) . . ?

N6 C65 C64 119.4(5) . . ?

N7 C71 C72 120.4(5) . . ?

C71 C72 C73 120.3(5) . . ?

C72 C73 C74 119.9(5) . . ?

C75 C74 C73 117.8(5) . . ?

N7 C75 C74 119.2(4) . . ?


_diffrn_measured_fraction_theta_max    0.993

_diffrn_reflns_theta_full              27.47

_diffrn_measured_fraction_theta_full   0.993

_refine_diff_density_max    0.588

_refine_diff_density_min   -0.670

_refine_diff_density_rms    0.110

#===END
